# Supplementary material for: Hospital Costs Associated With Agitation in the Acute Care Setting
Source: Atypon-hosted journal article supplement (doi:10.1176/appi.ps.201400508), 2015-08-03
Supplement: appi.ps.201400508.ds001.pdf [file appi.ps.201400508.ds001.pdf]

**Supporting document: online-only appendix****Table 1. Patient characteristics**

|                                     |                    | Control group |         | Patients with agitation |         |
|-------------------------------------|--------------------|---------------|---------|-------------------------|---------|
|                                     |                    | Average No.   | % or SD | Average No.             | % or SD |
| Gender                              | Female             | 158,239*      | 45.2%   | 2,519*                  | 47.2%   |
|                                     | Male               | 191,923*      | 54.8%   | 2,815*                  | 52.8%   |
| Age                                 |                    | 68.3*         | 17,2    | 80.5*                   | 11,2    |
| Weighted Elixhauser Index           |                    | 2.3*          | 1,8     | 3.0*                    | 1,7     |
| Index de comorbilidad de Elixhauser | None               | 69.556*       | 19,9%   | 299*                    | 5,6%    |
|                                     | One                | 70.256*       | 20,1%   | 873*                    | 16,4%   |
|                                     | Two or more        | 210.350*      | 60,1%   | 4.162*                  | 78,0%   |
| Type of admittance                  | Total discharges   | 350,162       | 100.0%  | 5,334                   | 100.0%  |
|                                     | Emergency          | 245,925*      | 70.2%   | 4,883*                  | 91.5%   |
|                                     | Scheduled          | 104,237*      | 29.8%   | 451*                    | 8.5%    |
| Type of discharge                   | To home            | 311,456*      | 88.9%   | 3,811*                  | 71.4%   |
|                                     | Other hospital     | 9,893*        | 2.8%    | 229*                    | 4.3%    |
|                                     | Other destinations | 8,404*        | 2.4%    | 567*                    | 10.6%   |
|                                     | Death              | 20,409*       | 5.8%    | 727*                    | 13.6%   |
| Days of stay                        |                    | 9.0*          | 10,1    | 12.0*                   | 11,5    |
| Adverse events                      |                    | 25,838*       | 7.4%    | 903*                    | 16.9%   |
| Surgical intervention               |                    | 95,697*       | 27.3%   | 557*                    | 10.4%   |
| GRD – AP grouper weight v. 25.0**   |                    | 2.2*          | 2,8     | 2.3*                    | 3,0     |

Note \* Significantly different in  $p < 0.01$  in the bilateral equality test of the column proportions. The tests assume equal variations. Abbreviations: No. = number; SD = Standard Deviation  
\*\* for the calculation of the mean DRG weight the All Patient version of DRG grouper was used

As no direct information is available on the prevalence of agitation at the different departments of the hospitals in the RECH network a proxy for this information as of the major diagnostic category (MDC) for each discharge of patients in the control group and the group with agitation from the APR-DRG grouper was used. The indication of the number of discharges or % according to its major diagnostic category provides information to identify at which department agitation was assumed to be more prevalent.

As shown in table 2, the distribution of patients for both the control group and the group with agitation is not homogeneous and, as stated in the methods section, is one of the reasons for the use of propensity score matching for controlling selection bias. Nevertheless, for both groups, respiratory system was the most frequent major diagnostic category while the second most populated was circulatory system for the control group and kidney and urinary tract for the group with agitation (without considering the Burns and Eye category because of their low number of cases with agitation). The three mentioned major diagnostic categories (respiratory, circulatory, kidney and urinary tract) and the nervous system include around 65% of all patients with agitation. On the other hand, the incidence of cases with agitation within major diagnostic categories varies from 0,59 % (Blood) to 3,41 % (again kidney and urinary tract). Besides the evident relevance of kidney and urinary tract as major diagnostic category, there is not a straightforward pattern of the distribution of patients with agitation. These aspects of the analysis could be

helpful for further research to improve the definition of the most frequent profile of the patients in the group with agitation.

**Table 2. Major diagnostic category information**

| Major diagnostic category information                                 | Control group |       | Patients with agitation |       |                     |
|-----------------------------------------------------------------------|---------------|-------|-------------------------|-------|---------------------|
|                                                                       | No.           | %     | No.                     | %     | % in total category |
| ALCOHOL/DRUG USE & ALCOHOL/DRUG INDUCED ORGANIC MENTAL DISORDERS      | 1.186         | ,3%   | 18                      | ,3%   | 1,50%               |
| BURNS                                                                 | 0             | 0,0%  | 1                       | ,0%   | 100,00%             |
| DISEASES & DISORDERS OF BLOOD, BLOOD FORMING ORGANS                   | 6.361         | 1,8%  | 38                      | ,7%   | 0,59%               |
| DISEASES & DISORDERS OF THE CIRCULATORY SYSTEM                        | 66.299        | 18,9% | 727                     | 13,6% | 1,08%               |
| DISEASES & DISORDERS OF THE DIGESTIVE SYSTEM                          | 37.534        | 10,7% | 342                     | 6,4%  | 0,90%               |
| DISEASES & DISORDERS OF THE EAR, NOSE, MOUTH & THROUGHT               | 3.996         | 1,1%  | 42                      | ,8%   | 1,04%               |
| DISEASES & DISORDERS OF THE EYE                                       | 81            | ,0%   | 4                       | ,1%   | 4,71%               |
| DISEASES & DISORDERS OF THE FEMALE REPRODUCTIVE SYSTEM                | 732           | ,2%   | 12                      | ,2%   | 1,61%               |
| DISEASES & DISORDERS OF THE HEPATOBILIARY SYSTEM & PANCREAS           | 33.190        | 9,5%  | 225                     | 4,2%  | 0,67%               |
| DISEASES & DISORDERS OF THE KIDNEY & URINARY TRACT                    | 23.323        | 6,7%  | 823                     | 15,4% | 3,41%               |
| DISEASES & DISORDERS OF THE MALE REPRODUCTIVE SYSTEM                  | 3.721         | 1,1%  | 37                      | ,7%   | 0,98%               |
| DISEASES & DISORDERS OF THE MUSCULOSKELETAL SYSTEM                    | 41.781        | 11,9% | 258                     | 4,8%  | 0,61%               |
| DISEASES & DISORDERS OF THE NERVOUS SYSTEM                            | 28.460        | 8,1%  | 618                     | 11,6% | 2,13%               |
| DISEASES & DISORDERS OF THE RESPIRATORY SYSTEM                        | 66.213        | 18,9% | 1.411                   | 26,5% | 2,09%               |
| DISEASES & DISORDERS OF THE SKIN, SUBCUTANEOUS TISSUE                 | 4.497         | 1,3%  | 88                      | 1,6%  | 1,92%               |
| ENDOCRINE, NUTRITIONAL & METABOLIC DISEASES & DISORDERS               | 6.232         | 1,8%  | 190                     | 3,6%  | 2,96%               |
| FACTORS INFLUENCING HEALTH STAT & OTHER CONTACTS WITH HEALTH SERVICES | 4.090         | 1,2%  | 29                      | ,5%   | 0,70%               |
| HUMAN IMMUNODEFICIENCY VIRUS INFECTIONS                               | 661           | ,2%   | 8                       | ,1%   | 1,20%               |
| INFECTIOUS & PARASITIC DISEASES, SYSTEMIC OR UNSPECIFIED              | 9.410         | 2,7%  | 232                     | 4,3%  | 2,41%               |
| INJURIES, POISONINGS & TOXIC EFFECTS OF DRUGS                         | 1.780         | ,5%   | 48                      | ,9%   | 2,63%               |
| MENTAL DISEASES & DISORDERS                                           | 4.226         | 1,2%  | 66                      | 1,2%  | 1,54%               |
| MULTIPLE SIGNIFICANT TRAUMA                                           | 382           | ,1%   | 4                       | ,1%   | 1,04%               |
| MYELOPROLIFERATIVE DISEASES & DISORDERS, POORLY DIAGNOSED             | 3.027         | ,9%   | 70                      | 1,3%  | 2,26%               |
| UNGROUPABLE                                                           | 2.980         | ,9%   | 43                      | ,8%   | 1,42%               |
